# Supplementary material for: Can linear transportation infrastructure verges constitute a habitat and/or a corridor for biodiversity in temperate landscapes? A systematic review protocol
Source: Springer Nature journal article supplement (doi:10.1186/s13750-016-0056-9), 2016-03-15
Supplement: MOESM1 [file 13750_2016_56_MOESM1_ESM.docx]

Additional file 1: List of search terms

| Biodiversity | | LTI | | Verges | | Management practices | | Habitats | | Continuity | | Measurements | |
| --- | --- | --- | --- | --- | --- | --- | --- | --- | --- | --- | --- | --- | --- |
| English | French | English | French | English | French | English | French | English | French | English | French | English | French |
| Biodiversity  Biological diversity  Diversity | Biodiversité Diversité biologique Diversité | Infrastructure | Infrastructure | Verge  Right of way  Verge  Dependency  Road shoulder  Emergency lane  Safe lane | Accotement  Bas-côté  Dépendance  Emprise  Berme  Bande d’arrêt d’urgence | Management  Intensive  Extensive | Gestion  Intensif  Extensif | Habitat  Landscape  Refuge | Habitat  Paysage  Refuge | Green infrastructures  Blue-green infrastructure  Greenway  Corridor  Ecological corridor  River corridor  Riparian corridor Linear landscape element | Trame verte et bleue  Corridor  Corridor écologique Trame bleue  Elément linéaire du paysage | Abundance  Floristic composition  Faunistic composition  Species richness  Diversity | Abondance  Composition floristique  Composition faunique  Richesse spécifique  Diversité |
| Species  Ecosystem  Ecotone  Community | Espèce  Ecosystème Ecotone Communauté | Linear | Linéaire | Edge  Side  Roadside | Côté  Bord de la route | Pesticide  Biocide  Insecticide  Herbicide  Fungicide Biological Control  Biocontrol  Fertilizing  Eradication | Pesticide  Biocide Insecticide Herbicide Fongicide  Lutte Biologique Fertilisation  Eradication | Forest  Woodland  Farmland  Agriculture  Crops  Urban  Grassland  Hayfield  Forest-edge  Hedgerow  Hedge  Heath  Moor  Rangeland  Pasture  Meadows  Wetland | Forêt  Zone sylvicole Zone forestière  Milieu agricole  Agriculture  Culture  Urbain  Prairie  Pré de fauche  Lisière  Haie  Landes  Pâturage  Prairies  Zone Humide | Migration corridor  Movement corridor  Movement lane  Migration lane  Migration  Migrate  Migratory  Movement  Mobility  Dispersal  Route  Itinerary  Passage  Path  Way  Pathway | Couloir de migration  Voie de déplacement  Migration  Migrer  Migratoire  Déplacement  Mobilité  Dispersion  Parcours  Itinéraire  Passage  Chemin  Parcours  Voie | Refuge  Habitat  Nesting site  Reproduction site  Feeding site | Refuge  Habitat  Site de nidification  Site de reproduction  Site d'alimentation |
| Flora  Plant | Flore  Plante  Végétaux | Transport  Transportation | Transport | Vicinity  Proximity | Aux alentours  Aux abords  A proximité de | Plantation  Mowing  Reaping  Plowing  Pruning  Weeding  Clearing  Cutting  Mulching  Rameal Chipped Wood (RCW) | Plantation  Coupe  Fauchage  Labour  Taille  Elagage  Désherbage  Nettoyage  Débroussaillage  Paillage  Bois Raméal Fragmenté (BRF) | Artificial  Man-made | Artificiel | Along  Alongside | Le long de | Dispersal  Movement  Gene Flow  Epizoochory  Seed dispersal | Dispersion  Déplacement Flux génétique  Flux de gènes  Flux de graine  Dispersion de graines |
| Fauna  Animal  Fish  Reptile  Birds  Amphibian  Mammal  Vertebrate  Insect | Faune  Animal  Poisson  Reptile  Oiseaux  Amphibien  Mammifère  Vertébré  Insecte | Rail  Railway  Railway lines  Railroad  Train track | Rail  Chemin de fer  Voie ferrée | Embankment  Ditch | Talus  Fossé | Fence  Fence line  Wire netting  Wire mesh | Barrières  Grillage |  |  | Viability  Population  Gene  Flow  Colonization | Viabilité  Population  Gène  Flux  Colonisation | Mortality  Loss  Decline | Mortalité  Perte  Déclin |
| Ecological  Natural | Ecologique Naturel | Canal  Waterway  Shipping lane  Navigation lane  Channel | Canal/Canaux  Voie navigable  Couloir de navigation  Chenal | Riparian  Riparian strip  Riverside  Riverine  Bank  Riverbank  Floodplain  Wetland | Zone riparienne  Ripisylve  Riverain  Rive  Côtés de la rivière  Berge  Plaine inondable  Zone humide | Restoration  Compensation Mitigation | Restauration  Compensation  Réduction |  |  | Connectivity  Connect  Connecting  Network  Continuity  Discontinuous  Discontinued | Connectivité  Connecter  Connectant  Réseau  Continuité  Discontinu | Invasion  Invasive  Allergy | Invasion  Invasive  Allergie |
| Conservation | Conservation | River  Stream  Course | Rivière  Fleuve  Ruisseau  Cours d’eau | Central reservation  Intersection reservation | Terre-plein central  Terre-plein au milieu d’un échangeur | Underpass  Overpass  Tunnel  Culvert | Passage à faune  Tunnel  Canalisation |  |  |  |  | Disturbance  Degradation | Perturbation  Dégradation |
| Nature  Wildlife | Nature  Faune sauvage  Flore | Power line  Electric line  High-tension line | Ligne électrique  Ligne à haute tension | Rest area | Aire de repos | Pasture | Pâturage |  |  |  |  |  |  |
| Exotic  Invasive  Indigenous  Native | Exotique  Invasif  Indigène  Native | Electric pylon | Pylône électrique | Buffer strip  Grass strip  Vegetated strip | Bande enherbée | Burning  Stubble burning | Brûlage  Brûlage dirigé  Brûlage de végétation  Brûlis |  |  |  |  |  |  |
| Aquatic  Terrestrial | Aquatique Terrestre | Pipeline  Gas pipeline  Oil pipeline | Pipeline  Pipe-line  Gazoduc  Oléoduc |  |  | Ditching | Creusement de fossé |  |  |  |  |  |  |
|  |  | Road  Highway  Motorway  Freeway  Roadway | Route  Autoroute  Chaussée |  |  | Pollution Contamination Depollution  Decontamination | Pollution Contamination Dépollution  Décontamination |  |  |  |  |  |  |
|  |  | Turnpike  Pike | Route à péage |  |  |  |  |  |  |  |  |  |  |
