# Supplementary material for: Can linear transportation infrastructure verges constitute a habitat and/or a corridor for biodiversity in temperate landscapes? A systematic review protocol
Source: Springer Nature journal article supplement (doi:10.1186/s13750-016-0056-9), 2016-03-15
Supplement: MOESM2 [file 13750_2016_56_MOESM2_ESM.docx]

**Additional file 2: List of includable studies identified by subject experts**

| 1. Akbar KF, Hale WHG, Headley AD, Ashraf I. Evaluation of Conservation Status of Roadside Verges and Their Vegetation in North England. Pol J Ecol. 2010;58:459–67.  2. Akbar KF, Hale WHG, Headley ADD. Floristic Composition and Environmental Determinants of Roadside Vegetation in North England. Pol J Ecol. 2009;57:73–88.  3. Akbar KF, Headley AD, Hale WHG, Athar M. A Comparative Study of De-Icing Salts (Sodium Chloride and Calcium Magnesium Acetate) on the Growth of Some Roadside Plants of England. Journal of Applied Sciences and Environmental Management. 2006;10:67–71.  4. Arévalo JR, Otto R, Escudero C, Fernández-Lugo S, Arteaga M, Delgado JD, et al. Do anthropogenic corridors homogenize plant communities at a local scale? A case studied in Tenerife (Canary Islands). Plant Ecology. 2010;209:23–35.  5. Arnett EB, Hayes JP. Bat Use of Roosting Boxes Installed under Flat-Bottom Bridges in Western Oregon. Wildlife Society Bulletin. 2000;28:890–4.  6. Askins RA, Folsom-O’Keefe CM, Hardy MC. Effects of Vegetation, Corridor Width and Regional Land Use on Early Successional Birds on Powerline Corridors. PLoS ONE. 2012;7:e31520.  7. Barnaud A, Kalwij JM, Berthouly-Salazar C, McGeoch MA, Jansen van Vuuren B. Are road verges corridors for weed invasion? Insights from the fine-scale spatial genetic structure of *Raphanus raphanistrum*. Weed Research. 2013;53:362–9.  8. Barrientos R, Bolonio L. The presence of rabbits adjacent to roads increases polecat road mortality. Biodiversity and Conservation. 2009;18:405–18.  9. Bellamy PE, Shore RF, Ardeshir D, Treweek R, Sparks TH. Road verges as habitat for small mammals in Britain. Mammal Review. 2000;30:131–9.  10. Benítez-López A, Alkemade R, Verweij PA. The impacts of roads and other infrastructure on mammal and bird populations: A meta-analysis. Biological Conservation. 2010;143:1307–16.  11. Bolger DT, Scott TA, Rotenberry JT. Use of corridor-like landscape structures by bird and small mammal species. Biological Conservation. 2001;102:213–24.  12. Brisson J, de Blois S, Lavoie C. Roadside as Invasion Pathway for Common Reed *Phragmites australis*. Invasive Plant Science and Management. 2010;3:506–14.  13. Brown GP, Phillips BL, Webb JK, Shine R. Toad on the road: Use of roads as dispersal corridors by cane toads *Bufo marinus* at an invasion front in tropical Australia. Biological Conservation. 2006;133:88–94.  14. Busch DE, Smith SD. Mechanisms Associated With Decline of Woody Species in Riparian Ecosystems of the Southwestern U.S. Ecological Monographs. 1995;65:347–70.  15. Cerboncini RAS, Roper JJ, Passos FC. Edge effects without habitat fragmentation? Small mammals and a railway in the Atlantic Forest of southern Brazil. Oryx. 2015;FirstView:1–8.  16. Chelazzi G, Naziridis T, Benvenuti S, Ugolini A, Crivelli AJ. Use of river-wetland habitats in a declining population of the terrapin *Mauremys rivulata* along the Strymon River, northern Greece. Journal of Zoology. 2007;271:154–61.  17. Christen D, Matlack G. The Role of Roadsides in Plant Invasions: a Demographic Approach. Conservation Biology. 2006;20:385–91.  18. Clark BK, Clark BS, Munsterman WE, Homerding TR. Differential use of roadside fencerows and contiguous pastures by small mammals in southeastern Oklahoma. The Southwestern Naturalist. 1996:54–9.  19. Clevenger AP, Chruszcz B, Gunson KE. Highway mitigation fencing reduces wildlife-vehicle collisions. Wildl Soc Bull. 2001;29:646–53.  20. Coles TF, Southey JM, Forbes I, Clough T. River wildlife databases and their value for sensitive environmental management. Regul Rivers: Res Mgmt. 1989;4:179–89.  21. Décamps H, Planty-Tabacchi AM, Tabacchi E. Changes in the hydrological regime and invasions by plant species along riparian systems of the Adour River, France. Regul Rivers: Res Mgmt. 1995;11:23–33.  22. Desserud P, Gates CC, Adams B, Revel RD. Restoration of foothills rough fescue grassland following pipeline disturbance in southwestern Alberta. J Environ Manage. 2010;91:2763–70.  23. Donna J. Clarke, Pearce KA, White JG. Powerline corridors: degraded ecosystems or wildlife havens? Wildlife Research. 2006;33:615.  24. Dussault C, Ouellet J-P, Laurian C, Courtois R, Poulin M, Breton L. Moose movement rates along highways and crossing probability models. Journal of Wildlife Management. 2007;71:2338.  25. Everson DA, H. Boucher D. Tree species-richness and topographic complexity along the riparian edge of the Potomac River. Forest Ecology and Management. 1998;109:305–14.  26. Fabritius H, Rönkä K, Ovaskainen O. The dual role of rivers in facilitating or hindering movements of the false heath fritillary butterfly. Mov Ecol. 2015;3:1–14.  27. Fahrig L, Rytwinski T. Effects of Roads on Animal Abundance: an Empirical Review and Synthesis. Ecol Soc. 2009;14:21.  28. Filibeck G, Cornelini P, Petrella P. Floristic analysis of a high-speed railway embankment in a Mediterranean landscape. Acta Botanica Croatica. 2012;71:229–48.  29. Fortin C, Doucet J. [Small mammals and land taken by electricity pylons situated in the forest environment.]. Naturaliste Canadien (Quebec). 2008;132:32–40.  30. Fortin C, Galois P, Ouellet M, Doucet GJ. [Use of electric pylon areas by amphibians and reptiles of the deciduous forest of Quebec.]. Naturaliste Canadien (Quebec). 2004;128:68–75.  31. Graitson E, Hussin J, Parent G-H. Le rôle des voies ferrées dans la mise en place des reptiles en Belgique et dans quelques territoires adjacents (Nord et Nord-Est de la France, Grand-Duché de Luxembourg). Les naturalistes Belges. 2000;81:376–95.  32. Graitson E. L’herpétofaune des bords de route en Wallonie: analyse de 101 stations. Naturalistes Belges (Les). 2006;87:73–80.  33. Graitson E. Répartition et écologie des reptiles sur le réseau ferroviaire en Wallonie. Bulletin de la Société herpétologique de France. 2006;120:15–32.  34. Greenberg CH, Crownover SH, Gordon DR. Roadside soils: A corridor for invasion of xeric shrub by nonindigenous plants. Natural Areas Journal. 1997;17:99–109.  35. Grilo C, Sousa J, Ascensão F, Matos H, Leitão I, Pinheiro P, et al. Individual Spatial Responses towards Roads: Implications for Mortality Risk. PLoS ONE. 2012;7:e43811.  36. Hansen MJ, Clevenger AP. The influence of disturbance and habitat on the presence of non-native plant species along transport corridors. Biological Conservation. 2005;125:249–59.  37. Harvolk S, Symmank L, Sundermeier A, Otte A, Donath TW. Can artificial waterways provide a refuge for floodplain biodiversity? A case study from North Western Germany. Ecological Engineering. 2014;73:31–44.  38. Jacquemyn H, Looy KV, Breyne P, Honnay O. The Meuse river as a corridor for range expansion of the exotic plant species *Sisymbrium austriacum*: evidence for long-distance seed dispersal. Biol Invasions. 2009;12:553–61.  39. Jansson R, Zinko U, Merritt DM, Nilsson C. Hydrochory increases riparian plant species richness: a comparison between a free-flowing and a regulated river. Journal of Ecology. 2005;93:1094–103.  40. Jodoin Y, Lavoie C, Villeneuve P, Theriault M, Beaulieu J, Belzile F. Highways as corridors and habitats for the invasive common reed *Phragmites australis* in Quebec, Canada. Journal of Applied Ecology. 2008;45:459–66.  41. Johnston FM, Johnston SW. Impacts of Road Disturbance on Soil Properties and on Exotic Plant Occurrence in Subalpine Areas of the Australian Alps. Arctic, Antarctic, and Alpine Research. 2004;36:201–7.  42. Joly M, Bertrand P, Gbangou RY, White M-C, Dubé J, Lavoie C. Paving the Way for Invasive Species: Road Type and the Spread of Common Ragweed *Ambrosia artemisiifolia*. Environmental Management. 2011;48:514–22.  43. Jones IL, Bull JW, Milner-Gulland EJ, Esipov AV, Suttle KB. Quantifying habitat impacts of natural gas infrastructure to facilitate biodiversity offsetting. Ecology and Evolution. 2014;4:79–90.  44. Lavoie C, Jodoin Y, de Merlis AG. How did common ragweed *Ambrosia artemisiifolia L.* spread in Québec? A historical analysis using herbarium records. Journal of Biogeography. 2007;34:1751–61.  45. Leblond M, Dussault C, Ouellet J-P, Poulin M, Courtois R, Fortin J. Management of Roadside Salt Pools to Reduce Moose–Vehicle Collisions. Journal of Wildlife Management. 2007;71:2304.  46. Le Viol I, Chiron F, Julliard R, Kerbiriou C. More amphibians than expected in highway stormwater ponds. Ecological Engineering. 2012;47:146–54.  47. Le Viol I, Julliard R, Kerbiriou C, de Redon L, Carnino N, Machon N, et al. Plant and spider communities benefit differently from the presence of planted hedgerows in highway verges. Biological Conservation. 2008;141:1581–90.  48. Le Viol I, Mocq J, Julliard R, Kerbiriou C. The contribution of motorway stormwater retention ponds to the biodiversity of aquatic macroinvertebrates. Biological Conservation. 2009;142:3163–71.  49. Li Y, Yu J, Ning K, Du S, Han G, Qu F, et al. Ecological effects of roads on the plant diversity of coastal wetland in the Yellow River Delta. TheScientificWorldJournal. 2014;2014:952051.  50. Lym RG, Nelson JA. Biological Control of Leafy Spurge *Euphorbia esula* with Aphthona spp. along Railroad Verges. Weed Technology. 2000;14:642–6.  51. Major RE, Smith D, Cassis G, Gray M, Colgan DJ. Are roadside strips important reservoirs of invertebrate diversity? A comparison of the ant and beetle faunas of roadside strips and large remnant woodlands. Australian Journal of Zoology. 1999;47:611.  52. Merritt DM, Cooper DJ. Riparian vegetation and channel change in response to river regulation: a comparative study of regulated and unregulated streams in the Green River Basin, USA. Regul Rivers: Res Mgmt. 2000;16:543–64.  53. Meunier F, Fichet X, Verheyden C. [Use of motorway verges by raptors at different spatial and temporal scales]. Alauda. 2001;69:117–27.  54. Meunier F, Gauriat C, Verheyden C, Jouventin P. Végétation des dépendances vertes autoroutières : influences d’un mode de gestion extensif et du milieu traversé. Rev Ecol (Terre Vie). 1998;53:97–121.  55. Meunier FD, Corbin J, Verheyden C, Jouventin P. Effects of landscape type and extensive management on use of motorway roadsides by small mammals. Canadian Journal of Zoology. 1999;77:108–17.  56. Meunier FD, Verheyden C, Jouventin P. Bird communities of highway verges: Influence of adjacent habitat and roadside management. Acta Oecologica. 1999;20:1–13.  57. Meunier FD, Verheyden C, Jouventin P. Use of roadsides by diurnal raptors in agricultural landscapes. Biological Conservation. 2000;92:291–8.  58. Morelli F, Beim M, Jerzak L, Jones D, Tryjanowski P. Can roads, railways and related structures have positive effects on birds? – A review. Transportation Research Part D: Transport and Environment. 2014;30:21–31.  59. Morelli F. Importance of road proximity for the nest site selection of the Red-backed shrike *Lanius collurio* in an agricultural environment in Central Italy. Journal of Mediterranean Ecology. 2011;11:21–9.  60. Moroń D, Skórka P, Lenda M, Rożej-Pabijan E, Wantuch M, Kajzer-Bonk J, et al. Railway Embankments as New Habitat for Pollinators in an Agricultural Landscape. PLoS ONE. 2014;9:e101297.  61. Munguira M, Thomas J. Use of Road Verges by Butterfly and Burnet Populations, and the Effect. J Appl Ecol. 1992;29:316–29.  62. Naiman RJ, Decamps H, Pollock M. The Role of Riparian Corridors in Maintaining Regional Biodiversity. Ecological Applications. 1993;3:209–12.  63. Nilsson C, Grelsson G, Johansson M, Sperens U. Patterns of Plant Species Richness Along Riverbanks. Ecology. 1989;70:77–84.  64. Nilsson C, Svedmark M. Basic Principles and Ecological Consequences of Changing Water Regimes: Riparian Plant Communities. Environmental Management. 2002;30:468–80.  65. Noordijk J, Delille K, Schaffers AP, Sýkora KV. Optimizing grassland management for flower-visiting insects in roadside verges. Biological Conservation. 2009;142:2097–103.  66. O’Farrell PJ, Milton SJ. Road Verge and Rangeland Plant Communities in the Southern Karoo: Exploring What Influences Diversity, Dominance and Cover. Biodiversity and Conservation. 2006;15:921–38.  67. Penone C, Machon N, Julliard R, Le Viol I. Do railway edges provide functional connectivity for plant communities in an urban context? Biological Conservation. 2012;148:126–33.  68. Peris S, Morales J. Use of passages across a canal by wild mammals and related mortality. Eur J Wildl Res. 2004;50:67–72.  69. Perry MC, Osenton PC, Fallon FW, Fallon JE. Optimal management strategies for biodiversity within a powerline verge. In *Part II. Vegetation Management*. New Orleans, Louisiana, USA; 1997:133–9.  70. Peterson E, Hansen E, Kanaskie A. Spatial relationship between *Phytophthora ramorum* and roads or streams in Oregon tanoak forests. For Ecol Manage. 2014;312:216–24.  71. Planty-Tabacchi A-M, Tabacchi E, Naiman RJ, Deferrari C, Décamps H. Invasibility of Species-Rich Communities in Riparian Zones. Conservation Biology. 1996;10:598–607.  72. Prunier JG, Kaufmann B, Léna J-P, Fenet S, Pompanon F, Joly P. A 40-year-old divided highway does not prevent gene flow in the alpine newt *Ichthyosaura alpestris*. Conservation Genetics. 2014;15:453–68.  73. Pysek P, Prach K. Plant Invasions and the Role of Riparian Habitats: A Comparison of Four Species Alien to Central Europe. Journal of Biogeography. 1993;20:413–20.  74. Rahlao SJ, Milton SJ, Esler KJ, Barnard P. The distribution of invasive *Pennisetum setaceum* along roadsides in western South Africa: the role of corridor interchanges: Corridor interchange and plant invasion. Weed Research. 2010;50:537–43.  75. Rautenstrauch KR, Krausman PR. Preventing Mule Deer Drownings in the Mohawk Canal, Arizona. Wildlife Society Bulletin. 1989;17:280–6.  76. Redon (de) L, Le Viol I, Jiguet F, Machon N, Scher O, Kerbiriou C. Road network in an agrarian landscape: Potential habitat, corridor or barrier for small mammals? Acta Oecologica. 2015;62:58–65.  77. Rentch JS, Fortney RH, Stephenson SL, Adams HS, Grafton WN, Anderson JT. Vegetation-site relationships of roadside plant communities in West Virginia, USA. Journal of Applied Ecology. 2005;42:129–38.  78. Richardson DM, Holmes PM, Esler KJ, Galatowitsch SM, Stromberg JC, Kirkman SP, et al. Riparian vegetation: degradation, alien plant invasions, and restoration prospects. Diversity and Distributions. 2007;13:126–39.  79. Ries L, Debinski DM, Wieland ML. Conservation value of roadside prairie restoration to butterfly communities. Conservation Biology. 2001;15:401–11.  80. Ruiz-Capillas P, Mata C, Malo JE. Road verges are refuges for small mammal populations in extensively managed Mediterranean landscapes. Biological Conservation. 2013;158:223–9.  81. Russell KN, Ikerd H, Droege S. The potential conservation value of unmowed powerline strips for native bees. Biol Conserv. 2005;124:133–48.  82. Saarinen K, Valtonen A, Jantunen J, Saarnio S. Butterflies and diurnal moths along road verges: Does road type affect diversity and abundance? Biol Conserv. 2005;123:403–12.  83. Sabo JL, Sponseller R, Dixon M, Gade K, Harms T, Heffernan J, et al. Riparian Zones Increase Regional Species Richness by Harboring Different, Not More, Species. Ecology. 2005;86:56–62.  84. Sakchoowong W, Jaitrong W, Ogata K. Comparison of Ground-Ant Diversity Between Natural Forests and Disturbed Forests Along a Natural Gas Pipeline Transect in Thong Pha Phum National Park, Kanchanaburi Province. Kasetsart J (Nat Sci). 2009;43:64–73.  85. Samways MJ, Osborn R, Carliel F. Effect of a highway on ant (Hymenoptera: Formicidae) species composition and abundance, with a recommendation for roadside verge width. Biodivers Conserv. 1997;6:903–13.  86. Silverman B, Horn DJ, Purrington FF, Gandhi KJK. Oil Pipeline Corridor Through an Intact Forest Alters Ground Beetle (Coleoptera: Carabidae) Assemblages in Southeastern Ohio. Environmental Entomology. 2008;37:725–33.  87. S Rutkovska IP. The role of railway lines in the distribution of alien plant species in the territory of Daugavpils City (Latvia). Estonian Journal of Ecology. 2013;62:212.  88. Tikka PM, Hogmander H, Koski PS. Road and railway verges serve as dispersal corridors for grassland plants. Landsc Ecol. 2001;16:659–66.  89. Trewhella W, Harris S. The Effect of Railway Lines on Urban Fox *Vulpes vulpes* Numbers and Dispersal Movements. J Zool. 1990;221:321–6.  90. Tryjanowski P, Sparks TH, Jerzak L, Rosin ZM, Skórka P. A Paradox for Conservation: Electricity Pylons May Benefit Avian Diversity in Intensive Farmland: Paradox of the impact of pylons. Conservation Letters. 2014;7:34–40.  91. Valtonen A, Jantunen J, Saarinen K. Flora and lepidoptera fauna adversely affected by invasive *Lupinus polyphyllus* along road verges. Biol Conserv. 2006;133:389–96.  92. Valtonen A, Saarinen K, Jantunen J. Intersection reservations as habitats for meadow butterflies and diurnal moths: Guidelines for planning and management. Landscape and Urban Planning. 2007;79:201–9.  93. Vandevelde J-C, Bouhours A, Julien J-F, Couvet D, Kerbiriou C. Activity of European common bats along railway verges. Ecological Engineering. 2014;64:49–56.  94. Vandevelde J-C, Penone C, Julliard R. High-speed railways are not barriers to Pyronia tithonus butterfly movements. Journal of Insect Conservation. 2012;16:801–3.  95. vanDorp D, Schippers P, vanGroenendael JM. Migration rates of grassland plants along corridors in fragmented landscapes assessed with a cellular automation model. Landsc Ecol. 1997;12:39–50.  96. Vasconcelos PB, Araujo GM, Bruna EM. The role of roadsides in conserving Cerrado plant diversity. Biodivers Conserv. 2014;23:3035–50.  97. Vermeulen HJW, Opdam PFM. Effectiveness of roadside verges as dispersal corridors for small ground-dwelling animals: A simulation study. Landscape and Urban Planning. 1995;31:233–48.  98. Vermeulen H. Corridor Function of a Road Verge for Dispersal of Stenotopic Heathland Ground Beetles Carabidae. Biol Conserv. 1994;69:339–49.  99. Lippe M Von Der, Kowarik I. Long-Distance Dispersal of Plants by Vehicles as a Driver of Plant Invasions. Conservation Biology. 2007;21:986–96.  100. Wagner DL, Ascher JS, Bricker NK. A Transmission Verge as Habitat for Wild Bees (Hymenoptera: Apoidea: Anthophila) in Connecticut. Annals of the Entomological Society of America. 2014;107:1110–20.  101. Wrzesień M, Denisow B. The usable taxons in spontaneous flora of railway areas of the central-eastern part of Poland. Acta Agrobotanica. 2006;59:95–108.  102. Yost AC, Wright RG. Moose, caribou, and grizzly bear distribution in relation to road traffic in Denali National Park, Alaska. Arctic. 2001;54:41–8. |
| --- |
